# Supplementary material
Source: HighWire-hosted journal article supplement (https://erj.ersjournals.com/content/60/2/2101994)
Supplement: inline-supplementary-material-2 [file inline-supplementary-material-2.pdf]

**Supplementary Table S2:** Grouped variant testing in COPDGene using SKAT-O

|                                                       | <b>CF-causing</b>                     |                                               | <b>CF-causing<br/>+<br/>Varying clinical consequence</b> |                                               | <b>CF-causing<br/>+<br/>Varying clinical<br/>consequence<br/>+<br/>Predicted<br/>functional</b> | <b>All coding<br/>variants</b> |
|-------------------------------------------------------|---------------------------------------|-----------------------------------------------|----------------------------------------------------------|-----------------------------------------------|-------------------------------------------------------------------------------------------------|--------------------------------|
| <b># of Variants</b>                                  | 36 (33 variants in weighted analysis) |                                               | 61 (58 variants in weighted analysis)                    |                                               | 206                                                                                             | 297 <sup>1</sup>               |
| <b># of Alleles</b>                                   | 254                                   |                                               | 548                                                      |                                               | 866                                                                                             | 2820                           |
|                                                       | <b>p-value</b>                        | <b>p-value with<br/>weighting<sup>2</sup></b> | <b>p-value</b>                                           | <b>p-value with<br/>weighting<sup>2</sup></b> | <b>p-value</b>                                                                                  | <b>p-value</b>                 |
| <b>Chronic Bronchitis</b>                             | 0.016                                 | 0.015                                         | 0.055                                                    | 0.015                                         | 0.056                                                                                           | 0.15                           |
| <b>COPD</b>                                           | 0.049                                 | 0.044                                         | 0.14                                                     | 0.045                                         | 0.12                                                                                            | 0.088                          |
| <b>Severe COPD</b>                                    | 0.37                                  | 0.34                                          | 0.42                                                     | 0.35                                          | 0.20                                                                                            | 0.029                          |
| <b>Severe Exacerbations</b>                           | 0.18                                  | 0.17                                          | 0.38                                                     | 0.18                                          | 0.31                                                                                            | 0.30                           |
| <b>BMI</b>                                            | 0.22                                  | 0.20                                          | 0.40                                                     | 0.21                                          | 0.42                                                                                            | 0.30                           |
| <b>FEV1 percent predicted</b>                         | 0.25                                  | 0.22                                          | 0.18                                                     | 0.22                                          | 0.15                                                                                            | 0.23                           |
| <b>Percent Emphysema</b>                              | 0.37                                  | 0.38                                          | 0.42                                                     | 0.38                                          | 0.44                                                                                            | 0.20                           |
| <b>Airway Wall Thickness</b>                          | 0.11                                  | 0.11                                          | 0.019                                                    | 0.098                                         | 0.024                                                                                           | 0.028                          |
| <b>Bronchodilator Response<br/>% FEV1<sup>1</sup></b> | 0.023                                 | 0.020                                         | 0.025                                                    | 0.020                                         | 0.020                                                                                           | 0.21                           |

1. All -p-values are one-sided except for BDR which is two sided
2. SKAT was performed with weighting for %pancreatic insufficiency as a measure of disease severity. Three variants did not have pancreatic insufficiency data and were therefore excluded from the weighted analysis

**Supplementary Table S3: Burden testing in COPDGene stratified by current smoking status.** P-values and effect sizes for variant-set testing of *CFTR* variants with chronic bronchitis.

|                                                                                     | Current Smokers    |      |                     | Former Smokers     |      |              |
|-------------------------------------------------------------------------------------|--------------------|------|---------------------|--------------------|------|--------------|
|                                                                                     | Chronic Bronchitis |      | p-value/ OR*        | Chronic Bronchitis |      | p-value/ OR* |
|                                                                                     | Yes                | No   |                     | Yes                | No   |              |
| <b>CF-causing</b>                                                                   | 45<br>(39.5%)      | 69   | 0.0082<br>(OR=1.62) | 23<br>(17.2%)      | 111  | 0.082        |
| <b>CF-causing +<br/>Varying clinical<br/>consequence</b>                            | 76<br>(31.7%)      | 164  | 0.037<br>(OR=1.22)  | 33<br>(15.3%)      | 182  | 0.31         |
| <b>CF-causing +<br/>Varying clinical<br/>consequence +<br/>Predicted functional</b> | 115<br>(29.8%)     | 271  | 0.011<br>(OR=1.24)  | 54<br>(15.6%)      | 292  | 0.23         |
| <b>All coding variants</b>                                                          | 313<br>(26.8%)     | 856  | 0.45                | 150<br>(13.2%)     | 988  | 0.46         |
| <b>Controls<br/>(no CFTR variants)</b>                                              | 813<br>(23.9%)     | 2579 | -                   | 389<br>(13.5%)     | 2500 | -            |

\*All -p-values are one-sided. Odds ratios or beta coefficients are shown for all nominally significant associations (p<0.05).

**Supplementary Table S4: Burden testing in COPDGene stratified by COPD case control status.** P-values and effect sizes for variant-set testing of *CFTR* variants with chronic bronchitis.

|                                                                                     | COPD Cases         |      |                     | Smoking Controls   |      |              |
|-------------------------------------------------------------------------------------|--------------------|------|---------------------|--------------------|------|--------------|
|                                                                                     | Chronic Bronchitis |      | p-value/ OR*        | Chronic Bronchitis |      | p-value/ OR* |
|                                                                                     | Yes                | No   |                     | Yes                | No   |              |
| <b>CF-causing</b>                                                                   | 51 (38.1%)         | 83   | 0.0022<br>(OR=1.72) | 17 (14.9%)         | 97   | 0.37         |
| <b>CF-causing +<br/>Varying clinical<br/>consequence</b>                            | 72 (33.8%)         | 141  | 0.038<br>(OR=1.27)  | 37 (15.4%)         | 203  | 0.23         |
| <b>CF-causing +<br/>Varying clinical<br/>consequence +<br/>Predicted functional</b> | 106 (31.5%)        | 231  | 0.022<br>(OR=1.24)  | 62 (15.9%)         | 327  | 0.13         |
| <b>All coding variants</b>                                                          | 308 (28.1%)        | 787  | 0.16                | 150 (12.5%)        | 1047 | 0.11         |
| <b>Controls<br/>(no CFTR variants)</b>                                              | 701 (25.5%)        | 2050 | -                   | 493 (14.1%)        | 2996 | -            |

\*All -p-values are one-sided. Odds ratios or beta coefficients are shown for all nominally significant associations ( $p < 0.05$ ).

**Supplementary Table S5:** Single variant testing of all variants in COPDGene with severe COPD. Variants with minor allele count > 10 were included in this analysis.

| Variant ID         | HGVS ID<br>(legacy name)    | Allele counts | Severe COPD                        |                                    | Effect                                    | CFTR2 Determination                     | SNFEff function |
|--------------------|-----------------------------|---------------|------------------------------------|------------------------------------|-------------------------------------------|-----------------------------------------|-----------------|
|                    |                             |               | One sided p-value<br>(Effect Size) | One sided p-value with permutation |                                           |                                         |                 |
| rs142540482        | c.221G>A<br>(R74Q)          | 11            | 0.0038<br>(OR=7.30)                | 0.16                               | Missense variant                          | Reported in CFTR2;<br>not yet annotated | MODERATE        |
| chr7:117509093:G:A | c.224G>A<br>(R75Q)          | 459           | 0.0068<br>(OR=1.38)                | 0.02                               | Missense variant                          | Non CF-causing                          | MODERATE        |
| rs150157202        | c.2260G>A<br>(V754M)        | 28            | 0.015<br>(OR=2.76)                 | 0.09                               | Missense variant                          | Non CF-causing                          | MODERATE        |
| rs143486492        | c.890G>A<br>(R297Q)         | 17            | 0.050                              | 0.17                               | Missense variant                          | Reported in CFTR2;<br>not yet annotated | MODERATE        |
| chr7:117530975:G:A | c.350G>A<br>(R117H)         | 27            | 0.062                              | 0.16                               | Missense variant                          | Varying clinical consequence            | MODERATE        |
| rs151073129        | c.853A>T<br>(I285F)         | 21            | 0.081                              | 0.14                               | Missense variant                          | Reported in CFTR2;<br>not yet annotated | MODERATE        |
| chr7:117548796:G:A | c.1365G>A                   | 21            | 0.081                              | 0.15                               | Synonymous variant                        | Not reported in CFTR2                   | LOW             |
| chr7:117666903:C:T | c.4243-5C>T<br>(4375-5C->T) | 23            | 0.11                               | 0.16                               | Splice region variant<br>& intron variant | Reported in CFTR2;<br>not yet annotated | LOW             |
| chr7:117559594:T:G | c.1523T>G<br>(F508C)        | 19            | 0.11                               | 0.23                               | Missense variant                          | Non CF-causing                          | MODERATE        |
| rs34911792         | c.3705T>G<br>(S1235R)       | 131           | 0.13                               | 0.13                               | Missense variant                          | Non CF-causing                          | MODERATE        |
| rs1800094          | c.1581A>G                   | 78            | 0.15                               | 0.14                               | Synonymous variant                        | Not reported in CFTR2                   | LOW             |
| rs60887846         | c.2820T>G                   | 25            | 0.26                               | 0.07                               | Synonymous variant                        | Not reported in CFTR2                   | LOW             |

|                    |                                    |     |      |      |                                                  |                                         |          |
|--------------------|------------------------------------|-----|------|------|--------------------------------------------------|-----------------------------------------|----------|
| rs1800118          | c.3285A>T                          | 109 | 0.30 | 0.35 | Synonymous variant                               | Reported in CFTR2;<br>not yet annotated | LOW      |
| rs1800103          | c.2421A>G<br>(I807M)               | 10  | 0.31 | 0.21 | Missense variant                                 | Non CF-causing                          | MODERATE |
| rs371315549        | c.274-6T>C<br>(406-6T->C)          | 13  | 0.42 | 0.28 | Splice region variant<br>& intron variant        | Reported in CFTR2;<br>not yet annotated | LOW      |
| rs1800111          | c.2991G>C<br>(L997F)               | 29  | 0.45 | 0.45 | Missense variant &<br>splice region variant      | Non CF-causing                          | MODERATE |
| chr7:117531068:T:C | c.443T>C<br>(I148T)                | 22  | 0.50 | 0.63 | Missense variant                                 | Non CF-causing                          | MODERATE |
| chr7:117559655:G:A | c.1584G>A<br>(1716G/A)             | 290 | 0.51 | 0.54 | Splice region variant<br>& synonymous<br>variant | Non CF-causing                          | LOW      |
| rs1800112          | c.3080T>C<br>(I1027T)              | 11  | 0.57 | 0.53 | Missense variant                                 | Non CF-causing                          | MODERATE |
| rs199826652        | c.1521_1523<br>delCTT<br>(F508del) | 177 | 0.62 | 0.68 | Disruptive inframe<br>deletion                   | CF-causing                              | MODERATE |
| chr7:117642528:G:A | c.3808G>A<br>(D1270N)              | 86  | 0.65 | 0.57 | Missense variant                                 | Varying clinical<br>consequence         | MODERATE |
| rs75541969         | c.3454G>C<br>(D1152H)              | 14  | 0.68 | 0.66 | Missense variant                                 | Varying clinical<br>consequence         | MODERATE |
| chr7:117504290:C:T | c.91C>T<br>(R31C)                  | 28  | 0.69 | 0.70 | Missense variant                                 | Non CF-causing                          | MODERATE |
| rs140455771        | c.2249C>T<br>(P750L)               | 14  | 0.74 | 0.73 | Missense variant                                 | Varying clinical<br>consequence         | MODERATE |
| rs1800110          | c.2900T>C<br>(L967S)               | 29  | 0.76 | 0.69 | Missense variant                                 | Varying clinical<br>consequence         | MODERATE |
| rs1800109          | c.2898G>A<br>(3030G/A)             | 166 | 0.78 | 0.76 | Synonymous variant                               | Reported in CFTR2;<br>not yet annotated | LOW      |
| rs1800100          | c.2002C>T<br>(R668C)               | 105 | 0.84 | 0.82 | Missense variant                                 | Non CF-causing                          | MODERATE |
| rs115545701        | c.220C>T<br>(R74W)                 | 82  | 0.85 | 0.81 | Missense variant                                 | Varying clinical<br>consequence         | MODERATE |

|                    |                        |     |      |      |                    |                                         |          |
|--------------------|------------------------|-----|------|------|--------------------|-----------------------------------------|----------|
| rs151235408        | c.2245C>T<br>(2377C/T) | 14  | 0.86 | 0.84 | Synonymous variant | Reported in CFTR2;<br>not yet annotated | LOW      |
| chr7:117590400:G:C | c.1727G>C<br>(G576A)   | 85  | 0.88 | 0.93 | Missense variant   | Non CF-causing                          | MODERATE |
| chr7:117627538:G:T | c.3485G>T<br>(R1162L)  | 17  | 0.93 | 0.05 | Missense variant   | Non CF-causing                          | MODERATE |
| rs1800079          | c.509G>A<br>(R170H)    | 12  | 0.94 | 0.13 | Missense variant   | Non CF-causing                          | MODERATE |
| rs148783445        | c.4333G>A<br>(D1445N)  | 11  | 0.95 | 0.12 | Missense variant   | Reported in CFTR2;<br>not yet annotated | MODERATE |
| rs1800135          | c.4272C>T<br>(4404C/T) | 136 | 0.97 | 0.98 | Synonymous variant | Reported in CFTR2;<br>not yet annotated | LOW      |
| rs1800131          | c.3897A>G<br>(4029A/G) | 17  | 0.98 | 0.97 | Synonymous variant | Reported in CFTR2;<br>not yet annotated | LOW      |
| chr7:117603609:C:T | c.2735C>T<br>(S912L)   | 16  | 1.00 | 0.94 | Missense variant   | Unknown<br>significance                 | MODERATE |

**Supplementary Table S6:** CFTR Compound Heterozygous Subjects in COPDGene

| <b>Variant 1/ Variant 2<br/>HGVS</b>                            | <b>Variant<br/>Determination</b> | <b>Case/<br/>Control</b> | <b>Current<br/>Smoker<br/>Status</b> | <b>Chronic<br/>Bronchitis</b> | <b>Bronchiectasis</b>                               |
|-----------------------------------------------------------------|----------------------------------|--------------------------|--------------------------------------|-------------------------------|-----------------------------------------------------|
| c.1521_1523delCTT<br>c.1584G>A                                  | CF-causing/<br>Non CF causing    | Control                  | Current                              | No                            |                                                     |
| c.1521_1523delCTT<br>c.1584G>A                                  | CF-causing/<br>Non CF-causing    | Control                  | Former                               | No                            |                                                     |
| c.1521_1523delCTT<br>c.1584G>A                                  | CF-causing/<br>Non CF-causing    | Case                     | Former                               | Chronic<br>Bronchitis         | Bronchiectasis score=2; 2 lobes with bronchiectasis |
| c.1521_1523delCTT<br>c.1584G>A                                  | CF-causing/<br>Non CF-causing    | Case                     | Former                               | No                            |                                                     |
| c.1521_1523delCTT<br>c.2735C>T                                  | CF-causing/<br>MODERATE          | Control                  | Former                               | No                            |                                                     |
| c.1521_1523delCTT<br>c.3485G>T                                  | CF-causing/<br>Non CF-causing    | Case                     | Former                               | No                            |                                                     |
| c.1521_1523delCTT<br>c.650A>G                                   | CF-causing/<br>MODERATE          | Case                     | Former                               | No                            |                                                     |
| c.1521_1523delCTT<br>/<br>c.221G>A and<br>c.890G>A <sup>1</sup> | CF-causing/<br>MODERATE          | Case                     | Current                              | Chronic<br>Bronchitis         |                                                     |
| c.1521_1523delCTT<br>c.221G>A and<br>c.890G>A                   | CF-causing/<br>MODERATE          | Case                     | Current                              | Chronic<br>Bronchitis         |                                                     |
| c.1521_1523delCTT<br>c.2855T>C                                  | CF-causing/<br>MODERATE          | Control                  | Former                               | No                            |                                                     |
| c.1521_1523delCTT<br>c.2245C>T                                  | CF-causing/<br>LOW               | Case                     | Current                              | Chronic<br>Bronchitis         |                                                     |
| c.1521_1523delCTT<br>c.2002C>T                                  | CF-causing/<br>MODERATE          | Case                     | Former                               | No                            |                                                     |
| c.1521_1523delCTT<br>c.2002C>T                                  | CF-causing/<br>MODERATE          | Case                     | Former                               | Chronic<br>Bronchitis         | No bronchiectasis                                   |
| c.1521_1523delCTT                                               | CF-causing/                      | Case                     | Former                               | No                            |                                                     |

|                                |                                                                     |         |         |                       |                                                     |
|--------------------------------|---------------------------------------------------------------------|---------|---------|-----------------------|-----------------------------------------------------|
| c.2900T>C                      | Varying clinical consequence                                        |         |         |                       |                                                     |
| c.1521_1523delCTT<br>c.3285A>T | CF-causing/<br>LOW                                                  | Case    | Current | No                    |                                                     |
| c.1521_1523delCTT<br>c.4272C>T | CF-causing/<br>LOW                                                  | Case    | Former  | No                    |                                                     |
| c.1521_1523delCTT<br>c.4272C>T | CF-causing/<br>LOW                                                  | Control | Current | Chronic<br>Bronchitis |                                                     |
| c.1521_1523delCTT<br>c.4272C>T | CF-causing/<br>LOW                                                  | Case    | Current | Chronic<br>Bronchitis |                                                     |
| c.1521_1523delCTT<br>c.3705T>G | CF-causing/<br>Non CF-causing                                       | Control | Former  | No                    | Bronchiectasis score=5; 3 lobes with bronchiectasis |
| c.1521_1523delCTT<br>c.3705T>G | CF-causing/<br>Non CF-causing                                       | Case    | Current | No                    |                                                     |
| c.1521_1523delCTT<br>c.589T>C  | CF-causing/<br>LOW                                                  | Case    | Current | Chronic<br>Bronchitis |                                                     |
| c.1521_1523delCTT<br>c.224G>A  | CF-causing/<br>Non CF-causing                                       | Case    | Former  | No                    |                                                     |
| c.1521_1523delCTT<br>c.224G>A  | CF-causing/<br>Non CF-causing                                       | Case    | Former  | Chronic<br>Bronchitis | No bronchiectasis                                   |
| c.1521_1523delCTT<br>c.224G>A  | CF-causing/<br>Non CF-causing                                       | Case    | Current | No                    |                                                     |
| c.1521_1523delCTT<br>c.224G>A  | CF-causing/<br>Non CF-causing                                       | Case    | Former  | No                    |                                                     |
| c.1521_1523delCTT<br>c.224G>A  | CF-causing/<br>Non CF-causing                                       | Control | Current | No                    |                                                     |
| c.1521_1523delCTT<br>c.727A>G  | CF-causing/<br>MODERATE                                             | Control | Current | No                    |                                                     |
| c.3209G>A/<br>c.3808G>A        | Varying clinical<br>consequence/<br>Varying clinical<br>consequence | Control | Current | No                    |                                                     |
| c.350G>A/<br>c.2900T>C and     | Varying clinical<br>consequence/                                    | Case    | Former  | No                    |                                                     |



|                                                                      |                                                               |         |         |    |                                                     |
|----------------------------------------------------------------------|---------------------------------------------------------------|---------|---------|----|-----------------------------------------------------|
| c.3808G>A <sup>2</sup>                                               | Varying clinical consequence                                  |         |         |    |                                                     |
| c.1865G>A/<br>c.220C>T and<br>c.3808G>A <sup>3</sup>                 | Varying clinical consequence/<br>Varying clinical consequence | Case    | Former  | No |                                                     |
| c.220C>T and<br>c.3808G>A/<br>c.220C>T and<br>c.3808G>A <sup>3</sup> | Varying clinical consequence/<br>Varying clinical consequence | Control | Current | No |                                                     |
| c.220C>T and<br>c.3808G>A/<br>c.220C>T and<br>c.3808G>A <sup>3</sup> | Varying clinical consequence/<br>Varying clinical consequence | Control | Former  | No | Bronchiectasis score=6; 3 lobes with bronchiectasis |

<sup>1</sup> c.890G>A is often in cis with c.221G>A. Both variants are missense variants predicted to have moderate impact on CFTR protein

<sup>2</sup> c.2900T>C was found in cis with c.3808G>A in one subject. Both variants have varying clinical consequence.

<sup>3</sup> c.2900T>C is often in cis with c.3808G>A. Both variants have varying clinical consequence

**Supplementary Table S7:** Alternative variants IDs for compound heterozygous subjects in COPDGene

| <b>Variant 1/ Variant 2<br/>Variant ID</b>  | <b>Variant 1/ Variant 2<br/>HGVS ID</b>     | <b>Variant 1/ Variant 2<br/>Legacy Name</b> |
|---------------------------------------------|---------------------------------------------|---------------------------------------------|
| rs199826652/ chr7:117559655:G:A             | c.1521_1523delCTT/ c.1584G>A                | F508del/ 1716G/A                            |
| rs199826652/ chr7:117559655:G:A             | c.1521_1523delCTT/ c.1584G>A                | F508del/ 1716G/A                            |
| rs199826652/ chr7:117559655:G:A             | c.1521_1523delCTT/ c.1584G>A                | F508del/ 1716G/A                            |
| rs199826652/ chr7:117559655:G:A             | c.1521_1523delCTT/ c.1584G>A                | F508del/ 1716G/A                            |
| rs199826652/ chr7:117603609:C:T             | c.1521_1523delCTT/ c.2735C>T                | F508del/ S912L                              |
| rs199826652/ chr7:117627538:G:T             | c.1521_1523delCTT/ c.3485G>T                | F508del                                     |
| rs199826652/ rs121909046                    | c.1521_1523delCTT/c.650A>G                  | F508del/ E217G                              |
| rs199826652/<br>rs142540482 and rs143486492 | c.1521_1523delCTT/<br>c.221G>A and c.890G>A | F508del/ R74Q and R297Q                     |
| rs199826652/<br>rs142540482 and rs143486492 | c.1521_1523delCTT/<br>c.221G>A and c.890G>A | F508del/ R74Q and R297Q                     |
| rs199826652/ rs142773283                    | c.1521_1523delCTT/ c.2855T>C                | F508del/M952T                               |
| rs199826652/ rs151235408                    | c.1521_1523delCTT/ c.2245C>T                | F508del/2377C/T                             |
| rs199826652/ rs1800100                      | c.1521_1523delCTT/ c.2002C>T                | F508del                                     |
| rs199826652/ rs1800100                      | c.1521_1523delCTT/ c.2002C>T                | F508del                                     |
| rs199826652/ rs1800110                      | c.1521_1523delCTT/ c.2900T>C                | F508del/L967S                               |
| rs199826652/ rs1800118                      | c.1521_1523delCTT/ c.3285A>T                | F508del                                     |
| rs199826652/ rs1800135                      | c.1521_1523delCTT/ c.4272C>T                | F508del/4404C/T                             |
| rs199826652/ rs1800135                      | c.1521_1523delCTT/ c.4272C>T                | F508del/4404C/T                             |
| rs199826652/ rs1800135                      | c.1521_1523delCTT/ c.4272C>T                | F508del/4404C/T                             |
| rs199826652/ rs34911792                     | c.1521_1523delCTT/ c.3705T>G                | F508del/S1235R                              |
| rs199826652/ rs34911792                     | c.1521_1523delCTT/ c.3705T>G                | F508del/S1235R                              |
| rs199826652/ rs755619078                    | c.1521_1523delCTT/ c.589T>C                 | F508del                                     |
| rs199826652/ chr7:117509093:G:A             | c.1521_1523delCTT/ c.224G>A                 | F508del/R75Q                                |

|                                                                           |                                                   |                                     |
|---------------------------------------------------------------------------|---------------------------------------------------|-------------------------------------|
| rs199826652/ chr7:117509093:G:A                                           | c.1521_1523delCTT/ c.224G>A                       | F508del/R75Q                        |
| rs199826652/ chr7:117509093:G:A                                           | c.1521_1523delCTT/ c.224G>A                       | F508del/R75Q                        |
| rs199826652/ chr7:117509093:G:A                                           | c.1521_1523delCTT/ c.224G>A                       | F508del/R75Q                        |
| rs199826652/ chr7:117509093:G:A                                           | c.1521_1523delCTT/ c.224G>A                       | F508del/R75Q                        |
| rs199826652/ rs763914313                                                  | c.1521_1523delCTT/ c.727A>G                       | F508del                             |
| chr7:117611650:G:A/<br>chr7:117642528:G:A                                 | c.3209G>A/ c.3808G>A                              | R1070Q / D1270N                     |
| chr7:117530975:G:A/<br>rs115545701 and chr7:117642528:G:A                 | c.350G>A/ c.2900T>C and c.3808G>A                 | R117H/ R74W and D1270N              |
| rs121908759/<br>rs115545701 and chr7:117642528:G:A                        | c.1865G>A/ c.220C>T and c.3808G>A                 | G622D/ R74W and D1270N              |
| rs115545701 and chr7:117642528:G:A/<br>rs115545701 and chr7:117642528:G:A | c.220C>T and c.3808G>A/<br>c.220C>T and c.3808G>A | R74W and D1270N/<br>R74W and D1270N |
| rs115545701 and chr7:117642528:G:A/<br>rs115545701 and chr7:117642528:G:A | c.220C>T and c.3808G>A/<br>c.220C>T and c.3808G>A | R74W and D1270N/<br>R74W and D1270N |
