# Supplementary material
Source: HighWire-hosted journal article supplement (https://erj.ersjournals.com/content/60/2/2101994)
Supplement: inline-supplementary-material-3 [file inline-supplementary-material-3.pdf]

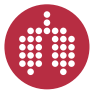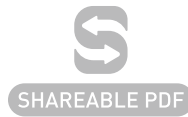

# CFTR variants are associated with chronic bronchitis in smokers

Aabida Saferali<sup>1,2</sup>, Dandi Qiao<sup>1,2</sup>, Wonji Kim <sup>1,2</sup>, Karen Raraigh<sup>3</sup>, Hara Levy<sup>4</sup>, Alejandro A. Diaz <sup>2,5</sup>, Garry R. Cutting <sup>3</sup>, Michael H. Cho <sup>1,2,5</sup> and Craig P. Hersh<sup>1,2,5</sup> on behalf of NHLBI TransOmics in Precision Medicine (TOPMed)

<sup>1</sup>Channing Division of Network Medicine, Brigham and Women's Hospital, Boston, MA, USA. <sup>2</sup>Harvard Medical School, Boston, MA, USA. <sup>3</sup>Johns Hopkins University School of Medicine, Baltimore, MD, USA. <sup>4</sup>Division of Pulmonary Medicine, Dept of Pediatrics, National Jewish Health, Denver, CO, USA. <sup>5</sup>Division of Pulmonary and Critical Care Medicine, Brigham and Women's Hospital, Boston, MA, USA.

Corresponding author: Craig P. Hersh ([craig.hersh@channing.harvard.edu](mailto:craig.hersh@channing.harvard.edu))

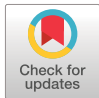

Shareable abstract (@ERSpublications)

Cigarette smokers who carry one deleterious *CFTR* variant have higher rates of chronic bronchitis, while presence of two *CFTR* variants associates with COPD. These results indicate that genetically mediated reduction in *CFTR* function contributes to COPD. <https://bit.ly/3GSWUXw>

**Cite this article as:** Saferali A, Qiao D, Kim W, *et al.* *CFTR* variants are associated with chronic bronchitis in smokers. *Eur Respir J* 2022; 60: 2101994 [DOI: 10.1183/13993003.01994-2021].

This single-page version can be shared freely online.

Copyright ©The authors 2022.  
For reproduction rights and  
permissions contact  
[permissions@ersnet.org](mailto:permissions@ersnet.org)

This article has an editorial  
commentary:  
[https://doi.org/10.1183/  
13993003.00898-2022](https://doi.org/10.1183/13993003.00898-2022)

Received: 3 Aug 2021  
Accepted: 14 Dec 2021

## Abstract

**Introduction** Loss-of-function variants in both copies of the cystic fibrosis transmembrane conductance regulator (*CFTR*) gene cause cystic fibrosis (CF); however, there is evidence that reduction in *CFTR* function due to the presence of one deleterious variant can have clinical consequences. Here, we hypothesise that *CFTR* variants in individuals with a history of smoking are associated with chronic obstructive pulmonary disease (COPD) and related phenotypes.

**Methods** Whole-genome sequencing was performed through the National Heart, Lung, and Blood Institute TOPMed (TransOmics in Precision Medicine) programme in 8597 subjects from the COPDGene (Genetic Epidemiology of COPD) study, an observational study of current and former smokers. We extracted clinically annotated *CFTR* variants and performed single-variant and variant-set testing for COPD and related phenotypes. Replication was performed in 2118 subjects from the ECLIPSE (Evaluation of COPD Longitudinally to Identify Predictive Surrogate Endpoints) study.

**Results** We identified 301 coding variants within the *CFTR* gene boundary: 147 of these have been reported in individuals with CF, including 36 CF-causing variants. We found that CF-causing variants were associated with chronic bronchitis in variant-set testing in COPDGene (one-sided  $p=0.0025$ ; OR 1.53) and in meta-analysis of COPDGene and ECLIPSE (one-sided  $p=0.0060$ ; OR 1.52). Single-variant testing revealed that the F508del variant was associated with chronic bronchitis in COPDGene (one-sided  $p=0.015$ ; OR 1.47). In addition, we identified 32 subjects with two or more *CFTR* variants on separate alleles and these subjects were enriched for COPD cases ( $p=0.010$ ).

**Conclusions** Cigarette smokers who carry one deleterious *CFTR* variant have higher rates of chronic bronchitis, while presence of two *CFTR* variants may be associated with COPD. These results indicate that genetically mediated reduction in *CFTR* function contributes to COPD related phenotypes, in particular chronic bronchitis.
